# Supplementary material for: Does it mix? Insights and attempts to predict the formability of single phase mixed A-cation lead iodide perovskites
Source: Royal Society of Chemistry journal article supplement (doi:10.1039/d3qi01615c), 2023-01-01
Supplement: d3qi01615c1.pdf [file d3qi01615c1.pdf]

## SUPPORTING INFORMATION

### Does it mix? Insights and attempts to predict the formability of single phase mixed A-cation lead iodide perovskites

F. B. Minussi<sup>1\*</sup>, R. M. Silva Jr.<sup>2</sup>, E. B. Araújo<sup>1</sup>

<sup>1</sup> Department of Physics and Chemistry, São Paulo State University, 15385-000, Ilha Solteira, SP, Brazil

<sup>2</sup> Department of Electrical Engineering, São Paulo State University, 15385-000, Ilha Solteira, SP, Brazil

### CONTENTS

|                                                                         |    |
|-------------------------------------------------------------------------|----|
| Supplementary Note 1: Typical A-site cations used in halide perovskites | S1 |
| Supplementary Note 2: Data used to construct tolerance factor plots     | S2 |
| Supplementary Note 3: Graphical visualization of descriptors            | S5 |
| Supplementary Note 4: Confidence ellipses                               | S6 |
| Supplementary Note 5: Additional X-ray diffraction data                 | S7 |
| Supplementary Note 6: Entropy of mixing                                 | S8 |
| References                                                              | S9 |

---

\* corresponding author: f.minussi@unesp.br

## Supplementary Note 1: Typical A-site cations used in halide perovskites

Table S1 - Ionic radius ( $r_A$ ), dipole moment ( $\mu_A$ ) and the number of N-H bonds ( $n_{NH}$ ) of some A-site cations used in halide perovskites. Dipole moment values were calculated using MolCalc [1].

| Cation               | Structure                                                                           | Symbol            | $r_A$ (pm)         | $\mu_A$ (D) | $n_{NH}$ |
|----------------------|-------------------------------------------------------------------------------------|-------------------|--------------------|-------------|----------|
| methylammonium       | 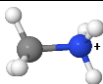   | MA <sup>+</sup>   | 217 <sup>[2]</sup> | 2.69        | 3        |
| cesium               |    | Cs <sup>+</sup>   | 188 <sup>[3]</sup> | 0           | 0        |
| hydrazinium          |    | HY <sup>+</sup>   | 217 <sup>[2]</sup> | 3.50        | 5        |
| trimethylsulfonium   |    | TMS <sup>+</sup>  | 244 <sup>[4]</sup> | 1.08        | 0        |
| azetidinium          |    | AZ <sup>+</sup>   | 250 <sup>[2]</sup> | 3.83        | 2        |
| formamidinium        |   | FA <sup>+</sup>   | 253 <sup>[2]</sup> | 0.22        | 4        |
| imidazolium          |  | IM <sup>+</sup>   | 258 <sup>[2]</sup> | 1.99        | 2        |
| dimethylammonium     |  | DMA <sup>+</sup>  | 272 <sup>[2]</sup> | 1.93        | 2        |
| ethylammonium        |  | EA <sup>+</sup>   | 274 <sup>[2]</sup> | 4.97        | 3        |
| acetamidinium        |  | AC <sup>+</sup>   | 277 <sup>[5]</sup> | 2.01        | 4        |
| guanidinium          |  | GA <sup>+</sup>   | 278 <sup>[2]</sup> | 0           | 6        |
| trimethylsulfoxonium |  | TMSO <sup>+</sup> | 289 <sup>[6]</sup> | 5.80        | 0        |

## Supplementary Note 2: Data used to construct tolerance factor plots

To calculate the Goldschmidt ( $t$ ) and Bartel ( $\tau$ ) tolerance factors of  $A_xMA_{1-x}PbI_3$  compounds, we used the relations respectively given by

$$t = \frac{(r_{eff} + r_X)}{\sqrt{2}(r_B + r_X)}$$

$$\tau = \frac{r_X}{r_B} - n_A \left[ n_A - \frac{(r_{eff}/r_B)}{\ln(r_A/r_B)} \right]$$

where  $r_{eff}$ ,  $r_B$  and  $r_X$  are the ionic radii of the cations at the A, B, and X sites and  $n_A$  is the oxidation number of the A-site cation. For solid solutions, effective ionic radii at the A-site were calculated using the relation  $r_{eff} = xr_A + (1 - x)r_{MA}$ , where  $r_A$  and  $r_{MA}$  are the ionic radius of substituent cation  $A^+$  and of  $MA^+$ , respectively, and  $x$  is the molar fraction of substitution. Ionic radii of A-site cations are given in Table S1. The radii used for  $B = Pb^{2+}$  and  $X = I^-$  were 119 and 220 pm [3], respectively. Calculated  $t$  and  $\tau$  values for compositions with experimental phase purity data are given in Table S2.

Table S2 - Calculated and experimental information on  $A_xMA_{1-x}PbI_3$  solid solutions. Methods are XRD: X-ray diffraction, UVS: UV-Vis spectroscopy and NMR: nuclear magnetic resonance.

| $A^+$   | $x$   | $t$   | $\tau$ | A-site segregate?  | Method  | Reference |
|---------|-------|-------|--------|--------------------|---------|-----------|
| -       | 0     | 0.912 | 3.884  | -                  | -       | -         |
| $Cs^+$  | 0.05  | 0.908 | 3.898  | Yes ( $CsPbI_3$ )  | XRD     | [7]       |
|         | 0.1   | 0.905 | 3.912  | Yes ( $CsPbI_3$ )  | XRD     | [7]       |
|         | 0.2   | 0.899 | 3.942  | Yes ( $CsPbI_3$ )  | XRD     | [7]       |
|         | 0.3   | 0.893 | 3.975  | Yes ( $CsPbI_3$ )  | XRD     | [7]       |
|         | 0.4   | 0.887 | 4.011  | Yes ( $CsPbI_3$ )  | XRD     | [7]       |
| $HY^+$  | 0.1   | 0.912 | 3.884  | No                 | UVS     | [8]       |
|         | 0.2   | 0.912 | 3.884  | No                 | UVS     | [8]       |
|         | 0.3   | 0.912 | 3.884  | No                 | UVS     | [8]       |
|         | 0.4   | 0.912 | 3.884  | Yes ( $HYPbI_3$ )  | UVS     | [8]       |
|         | 0.5   | 0.912 | 3.884  | Yes ( $HYPbI_3$ )  | UVS     | [8]       |
| $TMS^+$ | 0.025 | 0.913 | 3.878  | Yes ( $TMSPbI_3$ ) | XRD     | [6]       |
|         | 0.033 | 0.913 | 3.876  | Yes ( $TMSPbI_3$ ) | XRD     | [6]       |
|         | 0.046 | 0.914 | 3.873  | Yes ( $TMSPbI_3$ ) | XRD     | [6]       |
| $AZE^+$ | 0.01  | 0.912 | 3.881  | No                 | UVS/XRD | [9]       |
|         | 0.02  | 0.913 | 3.878  | No                 | UVS/XRD | [9]       |
|         | 0.05  | 0.915 | 3.869  | Yes ( $AZEPbI_3$ ) | UVS/XRD | [9]       |
|         | 0.10  | 0.918 | 3.855  | Yes ( $AZEPbI_3$ ) | UVS/XRD | [9]       |

Table S2 - Continued.

|                  |       |       |       |                            |         |      |
|------------------|-------|-------|-------|----------------------------|---------|------|
| AZE <sup>+</sup> | 0.25  | 0.929 | 3.815 | Yes (AZEPbI <sub>3</sub> ) | UVS/XRD | [9]  |
| FA <sup>+</sup>  | 0.050 | 0.915 | 3.868 | No                         | XRD     | [10] |
|                  | 0.075 | 0.917 | 3.860 | No                         | XRD     | [10] |
|                  | 0.10  | 0.919 | 3.852 | No                         | XRD     | [11] |
|                  | 0.125 | 0.921 | 3.845 | No                         | XRD     | [10] |
|                  | 0.15  | 0.923 | 3.837 | No                         | XRD     | [10] |
|                  | 0.175 | 0.925 | 3.830 | No                         | XRD     | [10] |
|                  | 0.20  | 0.927 | 3.823 | No                         | XRD     | [11] |
|                  | 0.30  | 0.934 | 3.797 | No                         | XRD     | [11] |
|                  | 0.40  | 0.942 | 3.773 | No                         | XRD     | [11] |
|                  | 0.50  | 0.949 | 3.751 | No                         | XRD     | [11] |
| IM <sup>+</sup>  | 0.10  | 0.920 | 3.848 | No                         | XRD     | [12] |
|                  | 0.20  | 0.929 | 3.816 | Yes (IMPbI <sub>3</sub> )  | XRD     | [12] |
|                  | 0.30  | 0.937 | 3.786 | Yes (IMPbI <sub>3</sub> )  | XRD     | [12] |
| DMA <sup>+</sup> | 0.05  | 0.917 | 3.859 | No                         | NMR     | [13] |
|                  | 0.10  | 0.923 | 3.836 | No                         | NMR     | [13] |
|                  | 0.15  | 0.929 | 3.815 | No                         | NMR     | [13] |
|                  | 0.20  | 0.934 | 3.795 | No                         | NMR     | [13] |
|                  | 0.25  | 0.940 | 3.777 | Yes (DMAPbI <sub>3</sub> ) | NMR     | [13] |
| EA <sup>+</sup>  | 0.09  | 0.922 | 3.839 | No                         | NMR/XRD | [14] |
|                  | 0.10  | 0.923 | 3.835 | No                         | UVS/XRD | [15] |
|                  | 0.16  | 0.931 | 3.809 | No                         | NMR/XRD | [14] |
|                  | 0.20  | 0.935 | 3.793 | No                         | UVS/XRD | [15] |
|                  | 0.21  | 0.936 | 3.789 | No                         | NMR/XRD | [14] |
|                  | 0.30  | 0.947 | 3.756 | No                         | UVS/XRD | [15] |
|                  | 0.31  | 0.948 | 3.753 | No                         | NMR/XRD | [14] |
|                  | 0.38  | 0.957 | 3.731 | No                         | NMR/XRD | [14] |
|                  | 0.40  | 0.959 | 3.725 | Yes (EAPbI <sub>3</sub> )  | UVS/XRD | [15] |
|                  | 0.50  | 0.971 | 3.698 | Yes (EAPbI <sub>3</sub> )  | UVS/XRD | [15] |
| AC <sup>+</sup>  | 0.10  | 0.924 | 3.833 | No                         | XRD     | [16] |
|                  | 0.20  | 0.937 | 3.789 | Yes (ACPbI <sub>3</sub> )  | XRD     | [16] |
|                  | 0.30  | 0.949 | 3.751 | Yes (ACPbI <sub>3</sub> )  | XRD     | [16] |
| GA <sup>+</sup>  | 0.025 | 0.915 | 3.870 | No                         | XRD     | [17] |
|                  | 0.05  | 0.918 | 3.857 | No                         | XRD     | [17] |
|                  | 0.075 | 0.921 | 3.844 | No                         | XRD     | [17] |
|                  | 0.10  | 0.924 | 3.832 | No                         | XRD     | [17] |

Table S2 - Continued.

|                   |       |       |       |                             |     |      |
|-------------------|-------|-------|-------|-----------------------------|-----|------|
|                   | 0.125 | 0.927 | 3.820 | No                          | XRD | [17] |
|                   | 0.15  | 0.931 | 3.809 | No                          | XRD | [17] |
|                   | 0.175 | 0.934 | 3.798 | No                          | XRD | [17] |
| GA <sup>+</sup>   | 0.20  | 0.937 | 3.787 | No                          | XRD | [18] |
|                   | 0.25  | 0.943 | 3.767 | No                          | XRD | [17] |
|                   | 0.30  | 0.950 | 3.749 | Yes (GAPbI <sub>3</sub> )   | XRD | [18] |
|                   | 0.40  | 0.962 | 3.717 | Yes (GAPbI <sub>3</sub> )   | XRD | [18] |
|                   | 0.50  | 0.975 | 3.689 | Yes (GAPbI <sub>3</sub> )   | XRD | [17] |
|                   | 0.025 | 0.915 | 3.868 | No                          | XRD | [6]  |
| TMSO <sup>+</sup> | 0.033 | 0.916 | 3.863 | Yes (TMSOPbI <sub>3</sub> ) | XRD | [6]  |
|                   | 0.046 | 0.918 | 3.855 | Yes (TMSOPbI <sub>3</sub> ) | XRD | [6]  |

### Supplementary Note 3: Graphical visualization of descriptors

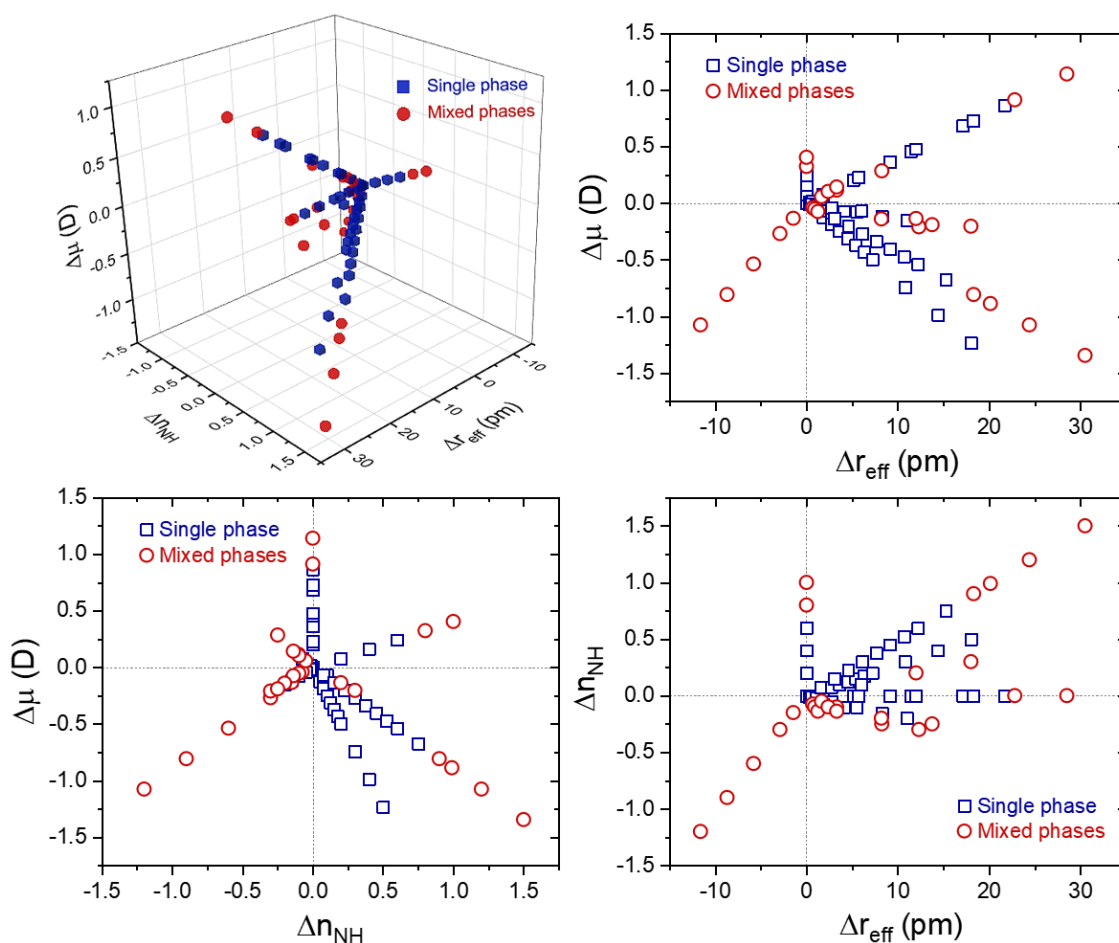

Figure S1 - 3D and 2D plots of physical descriptors proposed in this work. Note that the dipole moment descriptor ( $\Delta\mu$ ) doesn't provide any benefit for separating single phase from mixed phases data; data for both cases are encountered regardless if  $\Delta\mu$  is close or not to the origin or if it is positive or negative.

#### Supplementary Note 4: Confidence ellipses

Statistically calculated confidence ellipses for  $\Delta n_{NH}$  versus  $\Delta r_{eff}$  data are shown in Figure S2. In summary, these ellipses are ineffective in separating single and mixed-phase data because they are calculated to maximize the inclusion of a desired data set inside the region delimited by the ellipse under a given confidence level. By doing so, undesired data is included inside the ellipse (higher confidence levels) or desired data is not inside the ellipse (lower confidence levels). On the other hand, even if an optimal confidence level could be found, calculated ellipses are always rotated, which is unsuitable since we were aiming for the simplest equation possible. Clustering methods don't seem adequate as well because the data of mixed phases are too dispersed.

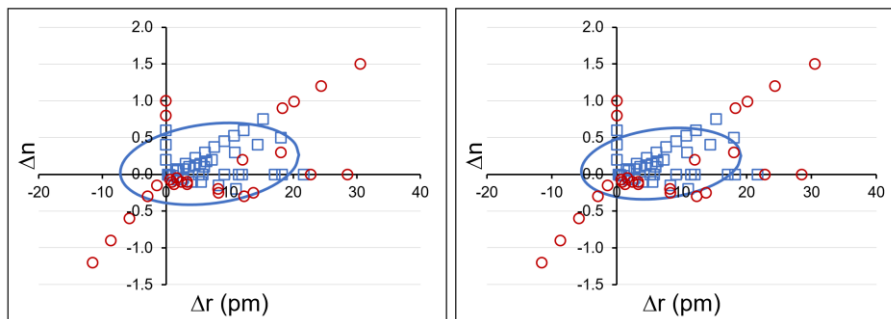

Figure S2 - Confidence ellipses of 95% (left) and 90% (right) levels. Blue and red dots are of single and mixed phases data, respectively.

## Supplementary Note 5: Additional X-ray diffraction data

To complement the solubility diagram, we synthesized twelve  $\text{GA}_x\text{FA}_y\text{MA}_{1-x-y}\text{PbI}_3$  compositions. Amounts of the precursors lead iodide ( $\text{PbI}_2$ , Sigma-Aldrich, 99%), methylammonium iodide ( $\text{CH}_3\text{NH}_3\text{I}$  or MAI, Sigma-Aldrich, 98%), formamidinium iodide ( $\text{CH}(\text{NH}_2)_2\text{I}$  or FAI, Sigma-Aldrich, 99%), and guanidinium iodide ( $\text{C}(\text{NH}_2)_3\text{I}$  or GAI, Sigma-Aldrich, 99%) were weighted in desired proportions. The precursors were manually mixed and ground to react in a natural agate mortar for about one hour under ambient conditions. The resulting black powders of perovskites were sieved in a 250  $\mu\text{m}$  aperture sieve, dried, and annealed for 6 h at 333 K in a laboratory oven with periodic (once an hour) stirring. Pelletized powders were produced with approximately 180 mg of the as-synthesized powders uniformly spread into a 10 mm diameter circular cavity of a metallic mold and compacted with a pressure of about 250 MPa. X-ray diffraction measurements (XRD) were performed in these pellets using a Rigaku Ultima IV diffractometer with  $\text{CuK}\alpha$  radiation ( $\lambda = 1.5406 \text{ \AA}$ ), under 40 kV and 20 mA, with a continuous scan ( $2^\circ \text{ min}^{-1}$ ), in the range of  $2\theta$  from 10 to 16° under controlled conditions (dark, at  $\sim 300 \text{ K}$  and relative humidity below 30%). Results are shown in Figure S3.

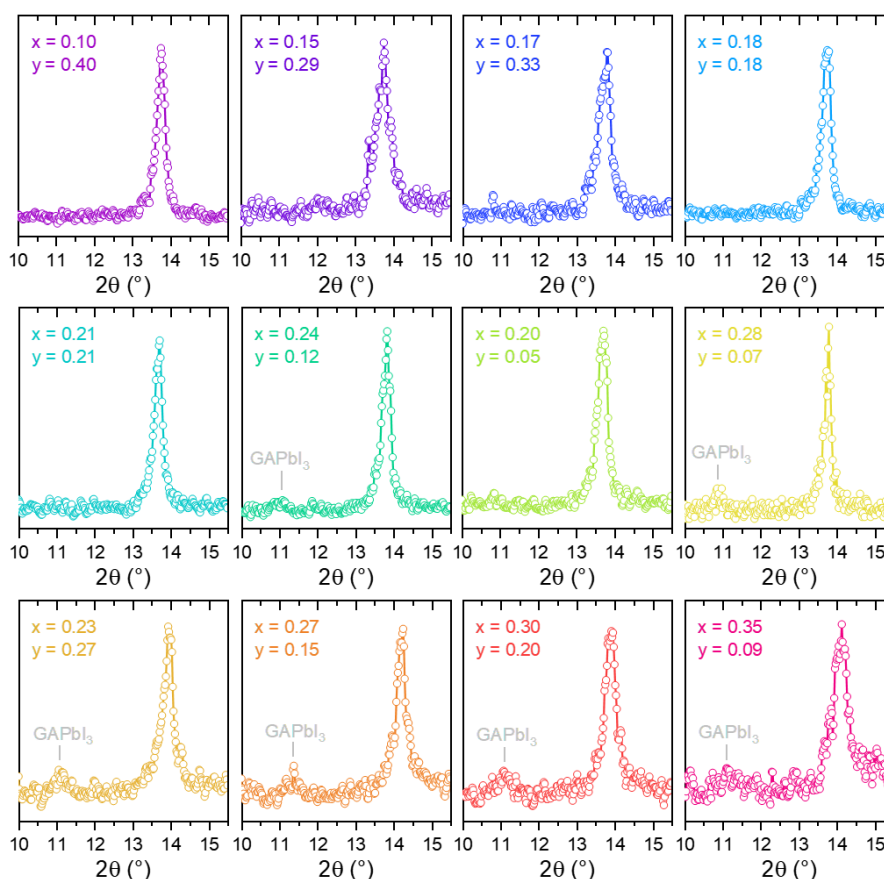

Figure S3 - XRD data of the synthesized  $\text{GA}_x\text{FA}_y\text{MA}_{1-x-y}\text{PbI}_3$  compositions.



## Supplementary Note 6: Entropy of mixing

To picture the changes in the entropy of mixing in  $\text{GA}_x\text{FA}_y\text{MA}_{1-x-y}\text{PbI}_3$  compositions, we used the classical approach of considering an entirely random of solutes under constant temperature, volume and pressure. The entropy of mixing in this ideal case can be given by

$$\Delta S_{mix} = -R[x \ln x + y \ln y + z \ln z]$$

where  $R$  is the universal gas constant and  $x$ ,  $y$  and  $z = 1 - x - y$  are the mole fractions of  $\text{GA}^+$ ,  $\text{FA}^+$  and  $\text{MA}^+$ . The ternary diagram of  $\Delta S_{mix}$  is given in Figure S4.

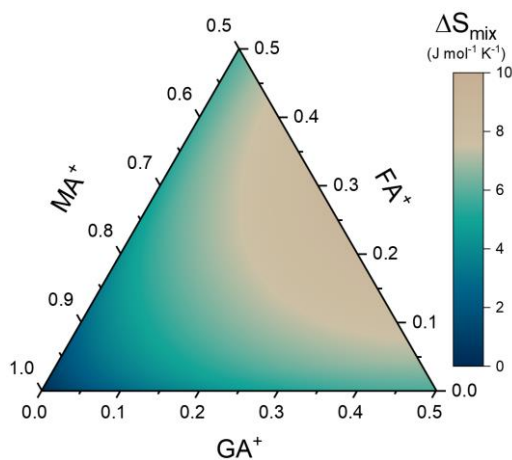

Figure S4 - Composition-dependent entropy of mixing in an ideal ternary  $\text{GA}_x\text{FA}_y\text{MA}_{1-x-y}\text{PbI}_3$  system.

## References

- [1] J. H. Jensen and J. C. Kromann, *J. Chem. Educ.*, 2013, 90, 1093.
- [2] G. Kieslich, S. Sun, and Anthony K. Cheetham, *Chem. Sci.*, 2015, 6, 3430.
- [3] R. D. Shannon, *Acta Crystallogr., Sect. A: Found. Adv.*, 1976, 32, 751.
- [4] A. Kaltzoglou et al., *Inorg. Chem.*, 2017, 56, 6302–6309.
- [5] P. Singh et al., *ACS Appl. Mater. Interfaces*, 2020, 12, 13982.
- [6] M. Parashar et al., *ACS Appl. Energy Mater.*, 2021, 4, 2751.
- [7] H. Choi et al., *Nano Energy*, 2014, 7, 80.
- [8] A. F. Akbulatov et al., *J. Mater. Chem. A*, 2016, 4, 18378.
- [9] S. R. Pering et al., *J. Mater. Chem. A*, 2017, 5, 20658.
- [10] A. Mohanty et al., *ACS Energy Lett.*, 2019, 4, 2045.
- [11] O. J. Weber, B. Charles, and M. T. Weller, *J. Mater. Chem. A*, 2016, 4, 15375.
- [12] Yi Zhang et al., *Nano Energy*, 2019, 58, 105.
- [13] W. M. J. Franssen et al., *Inorg. Chem.*, 2020, 59, 3730.
- [14] Mantas Šimėnas et al., *Chem. Mater.*, 2022, 34, 10104.
- [15] Yong Wang et al., *J. Energy Chem.*, 2018, 27, 215.
- [16] Pallavi Singh et al., *ACS Appl. Mater. Interfaces*, 2020, 12, 13982.
- [17] A. D. Jodlowski et al., *Nat. Energy*, 2017, 2, 972.
- [18] F. B. Minussi et al., *Chem. Commun.*, 2022, 58, 2212
